# Supplementary material for: Effect of Intradialytic Exercise on Cardiovascular Outcomes in Maintenance Hemodialysis: A Systematic Review and Meta-Analysis
Source: PubMed Central journal article supplement — Kidney360. 2024 Feb 2;5(3):390–413. doi: 10.34067/KID.0000000000000361 (PMC11000728; doi:10.34067/kid.0000000000000361), 2024-02-02
Supplement: kidney360-5-390-s002.pdf [file kidney360-5-390-s002.pdf]

## Study Identification

Sponsorship source

Country

Setting

Comments

Authors name

Institution

Email

Address

DOI

YEAR

## Methods

Design

Group

Decreasing heart medication dosages during and in relation to study? (if so, elaborate)

Recruitment period length

## Population

Inclusion criteria

Exclusion criteria

Group differences

% caucasian

consented (n=)

% diabetes

refused (n=)

etiology of ESRD

exercise group (n=)

control group (n=)

% female

ineligible (n=)

mean age control group

mean age exercise group  
mean # of years on dialysis for exercise group  
patient adherence (%)  
exercise group patients with hypertension (n=), (%)  
potential participants screened (n=)  
mean # of years on dialysis for control group  
exercise group patients with coronary artery disease (n=), (%)  
exercise group patients with chronic heart failure (n=), (%)  
control group patients with hypertension (n=), (%)  
control group patients with coronary artery disease (n=), (%)  
control group patients with chronic heart failure (n=), (%)  
Beta blockers - exercise group (n=), (%)  
Beta blockers - control group (n=), (%)  
Calcium channel blockers - exercise group (n=), (%)  
Calcium channel blockers - control group (n=), (%)  
ACE inhibitors or ARB - exercise group (n=), (%)  
ACE inhibitors or ARB - control group (n=), (%)

Recruitment start and end date  
Number allocated to group  
Number completed  
Number approached  
Number consented (baseline)  
Number withdrew + reasons  
Mean age baseline  
Mean BMI  
Mean Height  
Mean Weight  
Ethnic Group Breakdown  
Female (n=, %)  
Mean time on dialysis (in years)

Average duration of HD session  
Frequency of exercise done outside of intervention  
Diabetes (n=, %)  
Hypertension (n=, %)  
Arthritis (n=, %)  
Heart Disease (n=, %)  
Aetiology of kidney disease (CORR)  
ACE Inhibitors (n=, % of patients)  
Beta Blockers (n=, % of patients)  
Calcium Channel Blockers (n=, % of patients)  
Other BP Medications  
Other cardiac medications (ASA, platelet inhibitors (Plavix/ticagrelor, lipid lowering medications, nitrate)  
Smoker (n=%)  
Systolic BP  
Diastolic BP  
Dialysis Efficacy (kt/V)  
Hemoglobin (g/dL)  
Mean interdialytic fluid gain/volume of fluid removed  
Potassium (mEq/L)  
Calcium (mEq/L)  
Albumin (g/L)  
Dialysate calcium (mmol/L)

## Interventions

## Exercise

Type of exercise (aerobic, resistance, sham, none)  
Duration of intervention (weeks)  
Mean duration of exercise sessions (minutes)  
Frequency of sessions/week  
Intensity

Outcomes

Pulse Wave Velocity

Exercise Control

Baseline mean

Augmentation index

Exercise Control

Baseline Mean

SBP

Exercise Control

Baseline mean

DBP

Exercise Control

Baseline mean

Pulse Pressure

Exercise Control

Baseline mean

MAP

Baseline

mean

Exercise  
Control

LVEF

Baseline  
Mean

Exercise  
Control

Stroke Volume

Baseline  
mean

Exercise  
Control

Arterial Baroreflex sensitivity

Baseline  
mean

Exercise  
Control

HRV

Baseline  
mean

Exercise  
Control

Brain-natriuretic peptide

Baseline  
Mean

Exercise  
Control

LVMI

Baseline  
mean

Exercise  
Control

Hospitalizations for cardiovascular reasons

Baseline  
mean

Exercise  
Control

SBP slope

Baseline  
mean

Exercise  
Control

ABP

Baseline  
mean

Exercise  
Control

Central SBP

Baseline  
mean

Exercise  
Control

Central DBP

Baseline

mean

Exercise  
Control

EPC

Baseline  
mean

Exercise  
Control

Rate Pressure Product

Baseline  
mean

Exercise  
Control

LVSD

Baseline  
mean

Exercise  
Control

LVDD

Baseline  
mean

Exercise  
Control

LVPW

Baseline  
mean

Exercise  
Control

Diastolic Dysfunction

Baseline  
mean

Exercise  
Control

LVH

Baseline  
mean

Exercise  
Control

SPAP

Baseline  
mean

Exercise  
Control

BP Meds

Baseline  
mean

Exercise  
Control

LVM

Baseline  
Mean

Exercise  
Control

HR

Baseline



|                        |  |          |         |          |
|------------------------|--|----------|---------|----------|
|                        |  | Exercise | Control | Mean     |
| QRS                    |  |          |         | Baseline |
|                        |  |          |         | Mean     |
|                        |  | Exercise | Control |          |
| T Wave alternans       |  |          |         | Baseline |
|                        |  |          |         | n        |
|                        |  | Exercise | Control |          |
| BEI                    |  |          |         | Baseline |
|                        |  |          |         | Mean     |
|                        |  | Exercise | Control |          |
| Systolic volume        |  |          |         | Baseline |
|                        |  |          |         | mean     |
|                        |  | Exercise | Control |          |
| HRV (Mean RR Interval) |  |          |         | Baseline |
|                        |  |          |         | Mean     |
|                        |  | Exercise | Control |          |

HRV (LF/HF Ratio)

Baseline  
mean

Exercise  
Control

\_\_\_\_\_

\_\_\_\_\_

\_\_\_\_\_



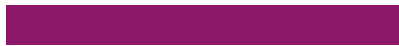

Control

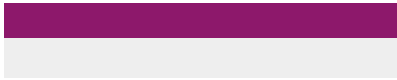

SD

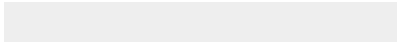

SD



Lwr CI

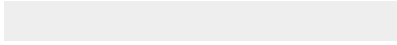

Lwr CI

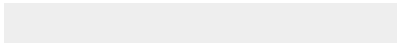

Lwr CI

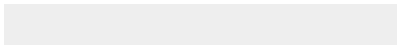

Lwr CI

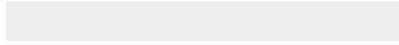

SD

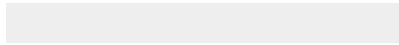

SD

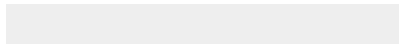

SD

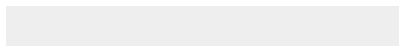

SD

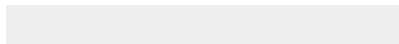

SD

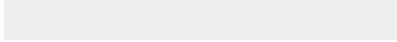

SD

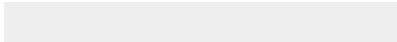

Lwr CI

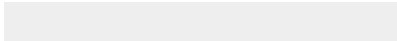

Lwr CI

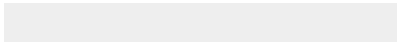

Lwr CI

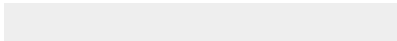

SD

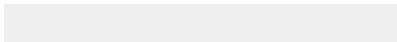



Lwr CI



Lwr CI



Lwr CI



Lwr CI



Lwr CI



Lwr CI



Lwr CI



Lwr CI



Lwr CI



Lwr CI



SD



SD

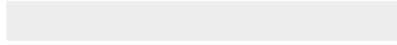

SD

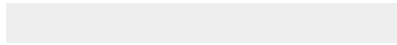

%

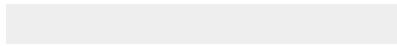

SD

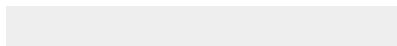

Lwr CI

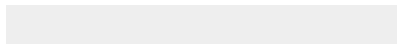

SD

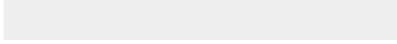

SD
